# Supplementary material for: NETMAGE: A human disease phenotype map generator for the network-based visualization of phenome-wide association study results
Source: PubMed Central journal article supplement (PMC8848314; doi:10.1093/gigascience/giac002), 2022-02-15
Supplement: giac002_supplemental_file.pdf [file giac002_supplemental_file.pdf]

## Supplementary Data

**Table S1.** A table of phenotypes with the highest centrality measures in the UKBB DDN. Diseases marked in bold appear multiple times as the most central nodes based upon our different network measures.

| <i>Phenotype</i>                          | <i>PheCode</i> | <i>Attribute</i>       | <i>Value</i>      |
|-------------------------------------------|----------------|------------------------|-------------------|
| <b>Hypothyroidism NOS</b>                 | 244.4          | Degree                 | 83                |
| <b>Disorders of lipid metabolism</b>      | 272            | Degree                 | 79                |
| <b>Type 2 diabetes</b>                    | 250.2          | Degree                 | 79                |
| Diabetes mellitus                         | 250            | Degree                 | 77                |
| <b>Hyperlipidemia</b>                     | 272.1          | Degree                 | 76                |
| <b>Celiac disease</b>                     | 557.1          | Weighted Degree        | $1.27 \cdot 10^5$ |
| Non-celiac intestinal malabsorption       | 557            | Weighted Degree        | $1.26 \cdot 10^5$ |
| <b>Hypothyroidism NOS</b>                 | 244.4          | Weighted Degree        | $7.48 \cdot 10^4$ |
| <b>Hypothyroidism</b>                     | 244            | Weighted Degree        | $7.39 \cdot 10^4$ |
| <b>Type 1 diabetes</b>                    | 250.1          | Weighted Degree        | $6.53 \cdot 10^4$ |
| <b>Psoriasis</b>                          | 696            | Weighted Degree        | $5.09 \cdot 10^4$ |
| Psoriasis NOS                             | 696.4          | Weighted Degree        | $5.11 \cdot 10^4$ |
| Disorders of muscle, ligament, and fascia | 728            | Closeness Centrality   | 1.00              |
| Fasciitis                                 | 728.7          | Closeness Centrality   | 1.00              |
| Other retinal disorders                   | 362            | Closeness Centrality   | 1.00              |
| Skin cancer                               | 172            | Betweenness Centrality | $2.15 \cdot 10^3$ |
| <b>Disorders of lipid metabolism</b>      | 272            | Betweenness Centrality | $1.97 \cdot 10^3$ |
| <b>Hyperlipidemia</b>                     | 272.1          | Betweenness Centrality | $1.97 \cdot 10^3$ |
| Essential hypertension                    | 401.1          | Betweenness Centrality | $1.84 \cdot 10^3$ |
| Hypertension                              | 401            | Betweenness Centrality | $1.19 \cdot 10^3$ |
| Coronary atherosclerosis                  | 411.4          | Betweenness Centrality | $7.72 \cdot 10^2$ |
| Intestinal malabsorption                  | 557            | Eigenvector Centrality | 1.00              |
| <b>Celiac disease</b>                     | 557.1          | Eigenvector Centrality | 1.00              |
| <b>Hypothyroidism NOS</b>                 | 244.4          | Eigenvector Centrality | 0.98              |
| <b>Hypothyroidism</b>                     | 244            | Eigenvector Centrality | 0.98              |
| <b>Type 1 diabetes</b>                    | 250.1          | Eigenvector Centrality | 0.95              |

|                                      |       |                        |      |
|--------------------------------------|-------|------------------------|------|
| <b>Type 2 diabetes</b>               | 250.2 | Eigenvector Centrality | 0.93 |
| Rheumatoid arthritis                 | 714.1 | Eigenvector Centrality | 0.89 |
| Other inflammatory polyarthropathies | 714   | Eigenvector Centrality | 0.89 |
| <b>Psoriasis</b>                     | 696   | Eigenvector Centrality | 0.86 |
